# Supplementary material for: OCT Assisted Quantification of Vitreous Inflammation in Uveitis
Source: PubMed Central journal article supplement (PMC8742534; doi:10.1167/tvst.11.1.3), 2022-01-04
Supplement: tvst-11-1-3_s001.pdf [file tvst-11-1-3_s001.pdf]

## Supplementary Materials

**Supplementary table 1. Mean OCT Vitreous Intensity at different AC cell Grades**

| AC Cell Grade | Number of Eyes | Mean OCT vitreous intensity (SD) |
|---------------|----------------|----------------------------------|
| 0             | 49             | -23.6 (1.65)                     |
| 0.5           | 17             | -23.1 (2.26)                     |
| 1             | 2              | -24.0 (1.09)                     |
| 2             | 4              | -23.9 (1.62)                     |
| 3             | 3              | -20.7 (0.75)                     |
| 4             | 1              | -21.0 (-)                        |

**Supplementary table 2. Mean difference of OCT vitreous intensity at NEI vitreous haze grades 0.5+ to 3+ compared to grade 0. (\*reference grade 0)**

*\*p<0.05, \*\*p<0.005 in the Wald Test*

| NEI vitreous haze* | Number of Eyes | Mean difference above reference (95% CI) |
|--------------------|----------------|------------------------------------------|
| Healthy eyes       | 41             | Reference                                |
| 0                  | 32             | 1.01 (0.42, 1.61)*                       |
| 0.5                | 25             | 2.47 (1.83, 3.11)**                      |
| 1                  | 13             | 2.61 (1.81, 3.42)**                      |
| 2                  | 4              | 2.52 (1.20, 3.85)**                      |
| 3                  | 3              | 2.28 (0.76 - 3.79)*                      |

**Supplementary table 3. Effect of phakic status on OCT vitreous intensity (Only one eye for grades 2 and 3 where cataract was present).**

| NEI vitreous haze grade | Mean OCT vitreous intensity (SD) |                  |
|-------------------------|----------------------------------|------------------|
|                         | Cataract not present             | Cataract present |
| 0                       | -24.4 (1.44)                     | -23.8 (1.48)     |
| 0.5                     | -23.2 (1.42)                     | -22.1 (3.14)     |
| 1                       | -23.1 (2.13)                     | -21.6 (1.33)     |
| 2                       | -23.0 (0.12)                     | -21.7 (-)        |
| 3                       | -22.1 (1.63)                     | -23.3 (-)        |

**Supplementary table 4. Mean visual acuity in different NEI Vitreous Haze Grades**

| NEI Vitreous Haze Grade | Number of Eyes | Mean LogMAR vision (nearest value, SD) |
|-------------------------|----------------|----------------------------------------|
| 0                       | 32             | 0.3 (0.5)                              |
| 0.5                     | 25             | 0.4 (0.6)                              |
| 1                       | 13             | 0.4 (0.7)                              |
| 2                       | 4              | 0.3 (0.3)                              |
| 3                       | 3              | -0.5 (0.5)                             |
